# Supplementary material for: Seed Coating with Triflumezopyrim Induces the Rice Plant’s Defense and Inhibits the Brown Planthopper’s Feeding Behavior
Source: MDPI journal article supplement (doi:10.3390/agronomy12051202), 2022-05-17
Supplement: s1 [file s1]

**Table S1.** Significance statistics by Figures.

|         |                                                                                                                                                                    |
|---------|--------------------------------------------------------------------------------------------------------------------------------------------------------------------|
| Fig. 1A | F=2.3, df=4, 14, P=0.13 for germination rates among four TZM concentrations (22.5, 45.0, 67.5, and 90.0 g a.i. ha <sup>-1</sup> ) and control, 7 days after sowing |
| Fig. 1B | F=2.45, df=4, 14, P=0.114 for seedling emergence rates among four TZM concentrations and control, 15 days after sowing                                             |
| Fig. 2A | F=95.5, df=7, 23, P=0.0001 for TZM residues of rice plant stem for 22.5 g a.i. ha <sup>-1</sup> among different days after sowing                                  |
| Fig. 2B | F=100.6, df=7, 23, P=0.0001 for TZM residues of rice plant stem for 45.0 g a.i. ha <sup>-1</sup> among different days after sowing                                 |
| Fig. 2C | F=727.3, df=7, 23, P=0.0001 for TZM residues of rice plant stem for 67.5 g a.i. ha <sup>-1</sup> among different days after sowing                                 |
| Fig. 2D | F=74.9, df=7, 23, P=0.0001 for TZM residues of rice plant stem for 90 g a.i. ha <sup>-1</sup> among different days after sowing                                    |
| Fig. 3A | F=686.7, df=4, 14, P=0.0001 for oxalic acid content among four TZM concentrations and control, 60 days after sowing                                                |
| Fig. 3A | F=303.2, df=4, 14, P=0.0001 for oxalic acid content among four TZM concentrations and control, 90 days after sowing                                                |
| Fig. 3A | F=0.13, df=1, 29, P=0.7189 for the mean contents of oxalic acid between 60 days and 90 days                                                                        |
| Fig. 3A | F=836.8, df=4, 29, P=0.0001 for the mean contents of oxalic acid among four concentrations                                                                         |
| Fig. 3B | F=50.3, df=4, 14, P=0.0001 for flavonoids content among four TZM concentrations and control, 60 days after sowing                                                  |
| Fig. 3B | F=163.7, df=4, 14, P=0.0001 for flavonoids content among four TZM concentrations and control, 90 days after sowing                                                 |
| Fig. 3B | F=2.6, df=1, 29, P=0.1209 for the mean contents of flavonoids between 60 days and 90 days                                                                          |
| Fig. 3B | F=148.8, df=4, 29, P=0.0001 for the mean contents of flavonoids among four concentrations                                                                          |
| Fig. 3C | F=126.7, df=4, 14, P=0.0001 for phenols content among four TZM concentrations and control, 60 days after sowing                                                    |
| Fig. 3C | F=105.1, df=4, 14, P=0.0001 for phenols content among four TZM concentrations and control, 90 days after sowing                                                    |
| Fig. 3C | F=1.9, df=1, 29, P=0.1873 for the mean contents of phenols between 60 days and 90 days                                                                             |
| Fig. 3C | F=225.4, df=4, 29, P=0.0004 for the mean contents of phenols among four concentrations                                                                             |
| Fig. 3D | F=813.9, df=4, 14, P=0.0001 for callose content among four TZM concentrations and control, 60 days after sowing                                                    |
| Fig. 3D | F=1086.8, df=4, 14, P=0.0001 for callose content among four TZM concentrations and control, 90 days after sowing                                                   |
| Fig. 3D | F=0.02, df=1, 29, P=0.9016 for the mean contents of callose between 60 days and 90 days                                                                            |
| Fig. 3D | F=1848.9, df=4, 29, P=0.0001 for the mean contents of callose among four concentrations                                                                            |
| Fig. 4A | F=331.8, df=4, 74, P=0.0001 for the total duration of np waveforms among four TZM concentrations and control, 90 days after seed sowing                            |
| Fig. 4B | F=89.5, df=4, 74, P=0.0001 for the total duration of N2 waveforms among four TZM concentrations and control, 90 days after seed sowing                             |
| Fig. 4C | F=42.9, df=4, 74, P=0.0001 for the total duration of N3 waveforms among four TZM concentrations and control, 90 days after seed sowing                             |
| Fig. 4D | F=188.8, df=4, 74, P=0.0001 for the total duration of N4-a waveforms among four TZM concentrations and control, 90 days after seed sowing                          |
| Fig. 4E | F=170.7, df=4, 74, P=0.0001 for the total duration of N4-b waveforms among four TZM concentrations and control, 90 days after seed sowing                          |
| Fig. 4F | F=0.69, df=4, 74, P=0.5956 for the total duration of N5 waveforms among four TZM concentrations and control, 90 days after seed sowing                             |
| Fig. 5A | F=0.26, df=4, 74, P=0.9049 for the number of np occurrences among four TZM concentrations and controls                                                             |
| Fig. 5B | F=175.5, df=4, 74, P=0.0001 for the number of N1 occurrences among four TZM concentrations and control                                                             |
| Fig. 5C | F=47.9, df=4, 74, P=0.0001 for the number of N2 occurrences among four TZM concentrations and control                                                              |

|              |                                                                                                                                                                 |
|--------------|-----------------------------------------------------------------------------------------------------------------------------------------------------------------|
| Fig. 5D      | F=40.8, df=4, 74, P=0.0001 for the number of N3 occurrences among four TZM concentrations and control                                                           |
| Fig. 5E      | F=32.9, df=4, 74, P=0.0001 for the number of N4-a occurrences among four TZM concentrations and control                                                         |
| Fig. 5F      | F= 29.8, df=4, 74, P=0.0001 for the number of N4-b occurrences among four TZM concentrations and control                                                        |
| Fig. 5G      | F=0.47, df=4,74, P=0.7586 for the number of N5 occurrences among four TZM concentrations and control                                                            |
| Fig. 6A      | F=9.166, df=7, 79, P=0.0001 for the number of planthoppers (per 100 hills) among different days after sowing between 0 and 22.5 g a.i. ha <sup>-1</sup> of TZM. |
| Fig. 6B      | F=9.106, df=7, 79, P=0.0001 for the number of planthoppers (per 100 hills) among different days after sowing between 0 and 45 g a.i. ha <sup>-1</sup> of TZM.   |
| Fig. 6C      | F=9.19, df=7, 79, P=0.0001 for the number of planthoppers (per 100 hills) among different days after sowing between 0 and 67.5 g a.i. ha <sup>-1</sup> of TZM.  |
| Fig. 6D      | F=9.152, df=7, 79, P=0.0001 for the number of planthoppers (per 100 hills) among different days after sowing between 0 and 90 g a.i. ha <sup>-1</sup> of TZM.   |
| Table 1 61d  | F=1.279, df=3, 19, P=0.3154 for the control efficiency induced by four TZM concentrations (22.5, 45, 67.5 and 90 g a.i. ha <sup>-1</sup> ).                     |
| Table 1 69d  | F=0.365, df=3, 19, P=0.7795 for the control efficiency induced by four TZM concentrations (22.5, 45, 67.5 and 90 g a.i. ha <sup>-1</sup> ).                     |
| Table 1 82d  | F=1.834, df=3, 19, P=0.1816 for the control efficiency induced by four TZM concentrations (22.5, 45, 67.5 and 90 g a.i. ha <sup>-1</sup> ).                     |
| Table 1 90d  | F=0.905, df=3, 19, P=0.4604 for the control efficiency induced by four TZM concentrations (22.5, 45, 67.5 and 90 g a.i. ha <sup>-1</sup> ).                     |
| Table 1 101d | F=5.195, df=3, 19, P=0.0107 for the control efficiency induced by four TZM concentrations (22.5, 45, 67.5 and 90 g a.i. ha <sup>-1</sup> ).                     |
| Table 1 110d | F=1.508, df=3, 19, P=0.2506 for the control efficiency induced by four TZM concentrations (22.5, 45, 67.5 and 90 g a.i. ha <sup>-1</sup> ).                     |
| Table 1 121d | F=0.145, df=3, 19, P=0.9312 for the control efficiency induced by four TZM concentrations (22.5, 45, 67.5 and 90 g a.i. ha <sup>-1</sup> ).                     |
| Table 1 130d | F=3.543, df=3, 19, P=0.0386 for the control efficiency induced by four TZM concentrations (22.5, 45, 67.5 and 90 g a.i. ha <sup>-1</sup> ).                     |
