# Supplementary material for: Seed Coating with Triflumezopyrim Induces the Rice Plant’s Defense and Inhibits the Brown Planthopper’s Feeding Behavior
Source: MDPI journal article supplement (doi:10.3390/agronomy12051202), 2022-05-17
Supplement: s1 [file s1]

# Seed coating with triflumezopyrim induces the rice plant's defense and inhibits the brown planthopper feeding behavior

Chanyuan Xi<sup>1†</sup>, Sheraz Ahmad<sup>1†</sup>, Julong Yu<sup>2†</sup>, Jieyu Zhang<sup>1</sup>, Yu Chen<sup>1</sup>, Guo Zhang<sup>2</sup>, Haowen Zhu<sup>1</sup>, Linqun Ge<sup>1\*</sup>, XiangYang Yu<sup>2\*</sup>, Zhaolin Shu<sup>3</sup>.

<sup>†</sup> Showed equal to work

\* Corresponding author: [lqge@yzu.edu.cn](mailto:lqge@yzu.edu.cn) (L.G.); [yuxy@jaas.ac.cn](mailto:yuxy@jaas.ac.cn) (X.Y.)

## Supplementary Figure S1 for the EPG experiment

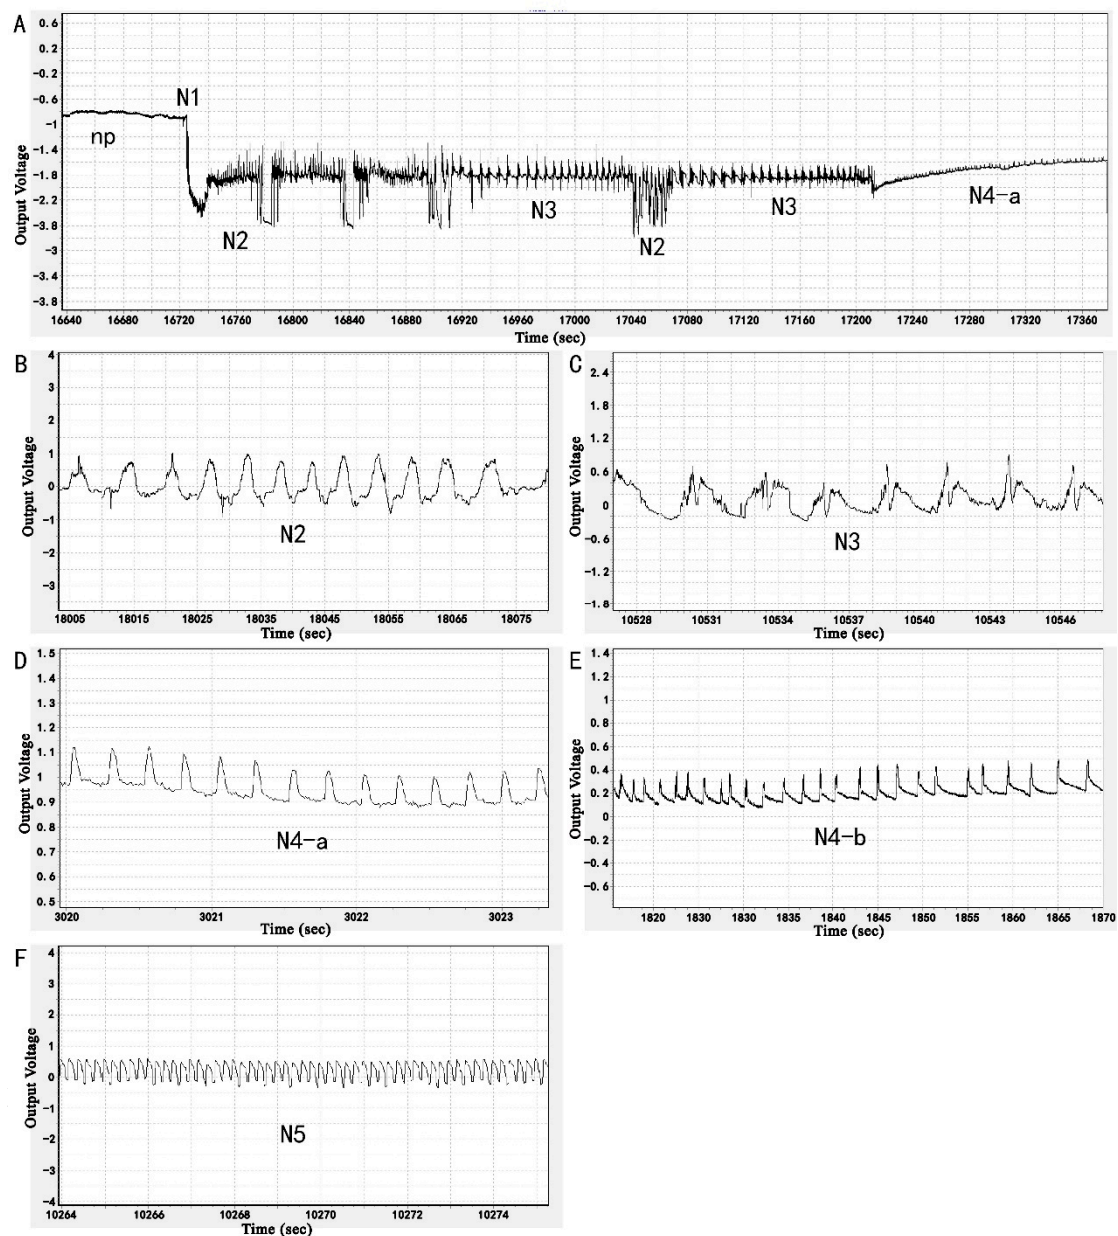

(N2 waveform); (C) extracellular activity near the phloem region (N3 waveform); (D) intracellular activity in the phloem region (N4-a waveform); (E) phloem sap ingestion (N4-b waveform); and (F) activity in the xylem region (N5).
